# Supplementary material for: Cardiac Rehabilitation Based on the Walking Test and Telerehabilitation Improved Cardiorespiratory Fitness in People Diagnosed with Coronary Heart Disease during the COVID-19 Pandemic
Source: PubMed Central journal article supplement (PMC7956401; doi:10.3390/ijerph18052241), 2021-02-24
Supplement: ijerph-18-02241-s001.pdf [file ijerph-18-02241-s001.pdf]

|         |     |       |     |        |    |     |    |
|---------|-----|-------|-----|--------|----|-----|----|
| 109     | 97  | 86    | 94  | 67     | 63 | 17  | 15 |
| 113     | 109 | 120   | 120 | 89     | 83 | 16  | 13 |
| 104     | 96  | 107   | 116 | 80     | 86 | 15  | 15 |
| 117     | 112 | 107   | 112 | 78     | 79 | 15  | 13 |
| 117     | 105 | 95    | 102 | 58     | 63 | 14  | 13 |
| 124     | 110 | 107   | 102 | 70     | 63 | 15  | 16 |
| 129     | 112 | 121   | 116 | 92     | 76 | 17  | 15 |
| 115     | 101 | 133   | 123 | 83     | 78 | 18  | 15 |
| 120     | 103 | 89    | 92  | 78     | 75 | 10  | 9  |
| 120     | 105 | 104   | 100 | 63     | 67 | 15  | 15 |
| 100     | 94  | 110   | 106 | 70     | 66 | 13  | 15 |
| 122     | 118 | 97    | 104 | 69     | 68 | 12  | 13 |
| 126     | 117 | 99    | 104 | 59     | 63 | 12  | 13 |
| 111     | 107 | 120   | 126 | 64     | 59 | 16  | 15 |
| 95      | 99  | 100   | 107 | 55     | 57 | 15  | 15 |
| 96      | 92  | 104   | 108 | 67     | 65 | 15  | 13 |
| seconds |     | HRmax |     | HRrest |    | RPE |    |
